# Supplementary material for: Connecting intermediate phenotypes to disease using multi-omics in heart failure
Source: PubMed Central journal article supplement (PMC11326335; doi:10.1101/2024.08.06.24311572), 2024-08-07
Supplement: media-5.pdf [file media-5.pdf]

# Supplemental Figures

## Supplemental Figure 1: Genomic, Transcriptomic, and Proteomic Associations - Additional Phenotypes

### MRI – LV Mass

A

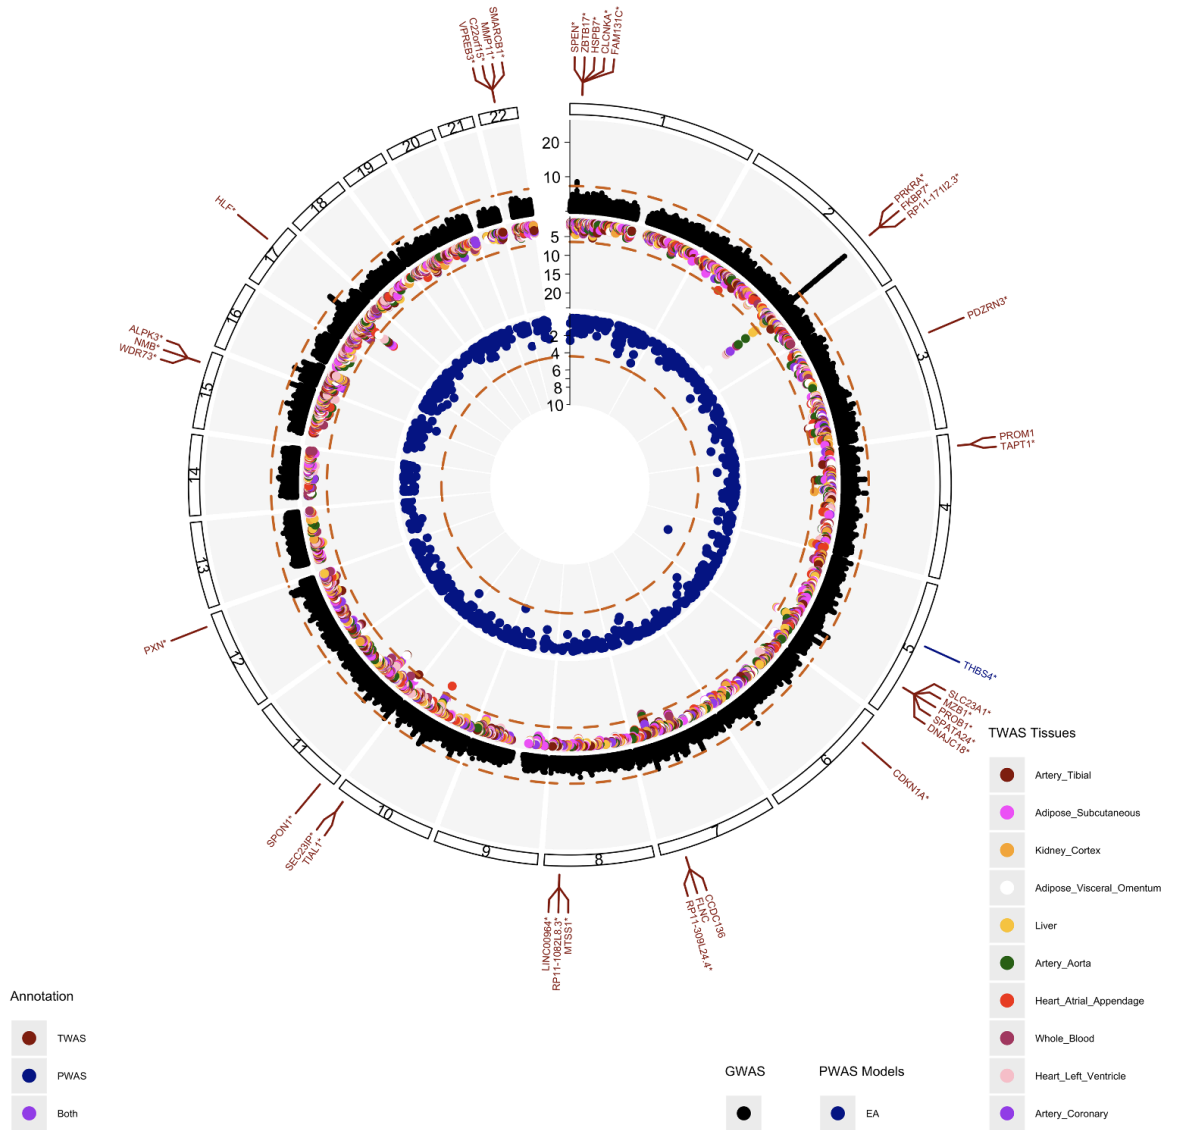

# MRI – LV End-Systolic Volume

**B**

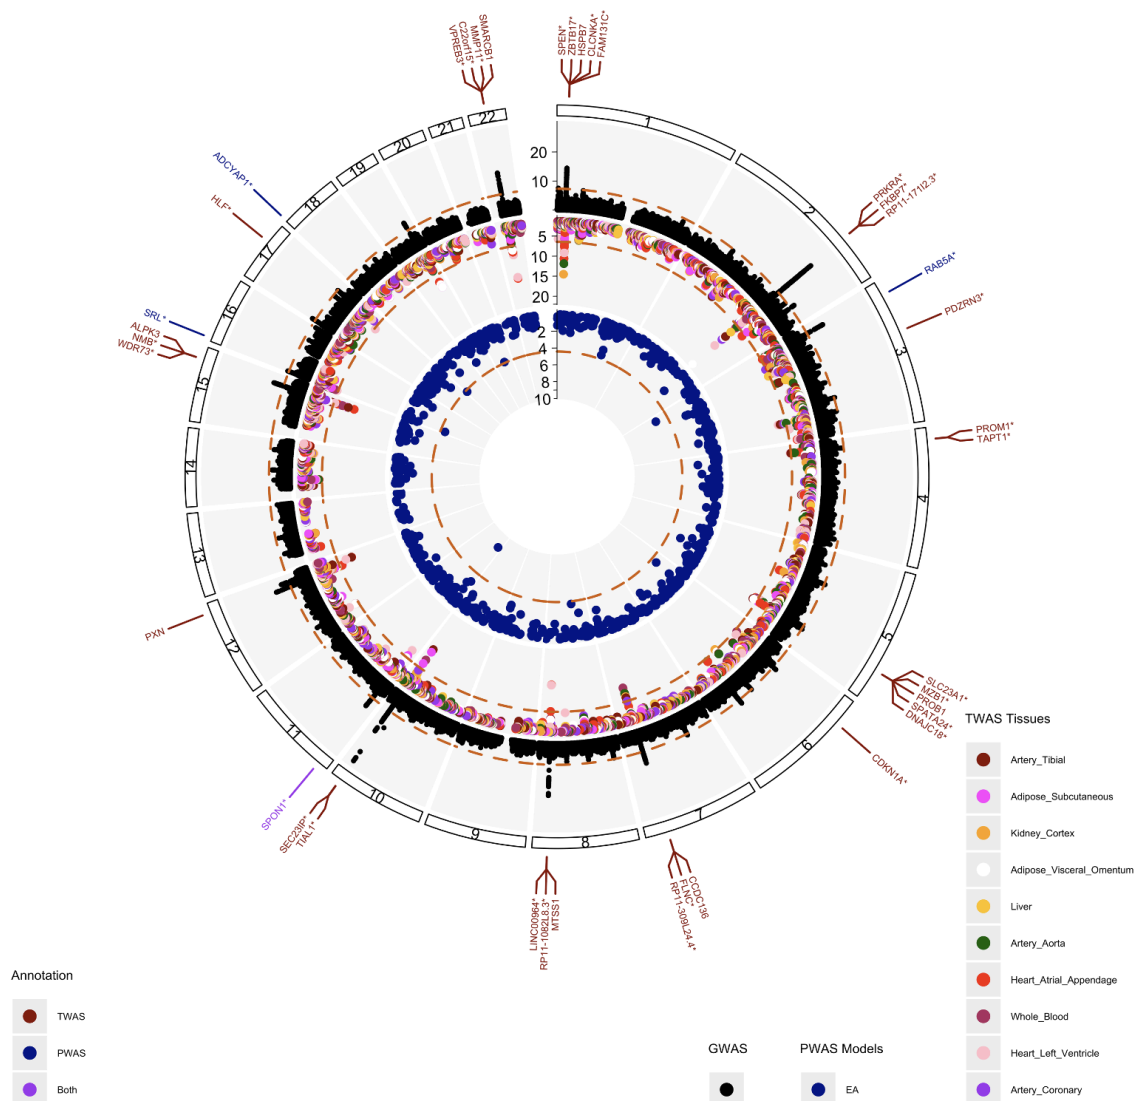

# MRI – LV End-Diastolic Volume

C

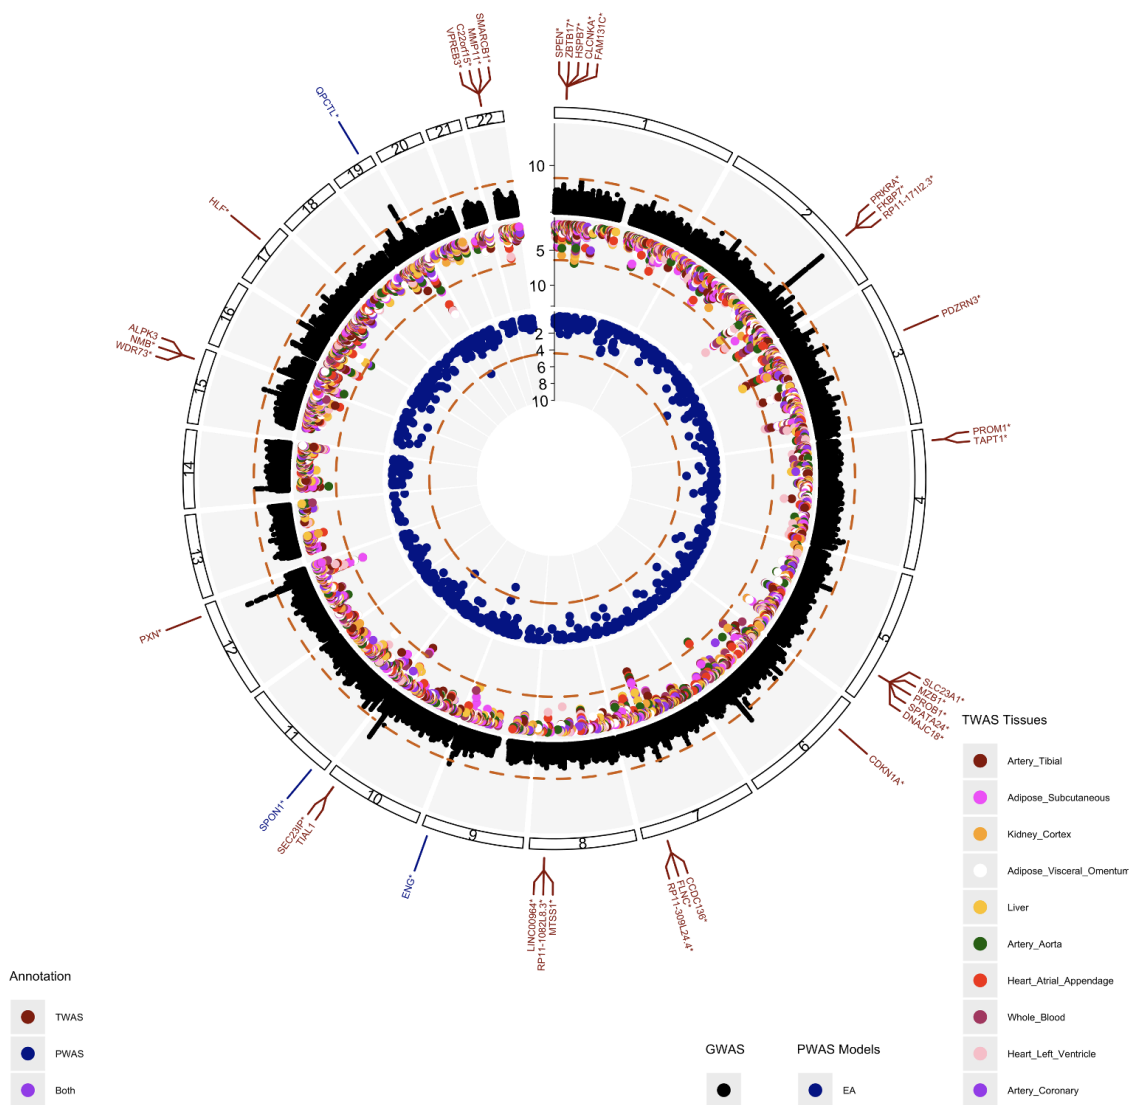

# HF - European

D

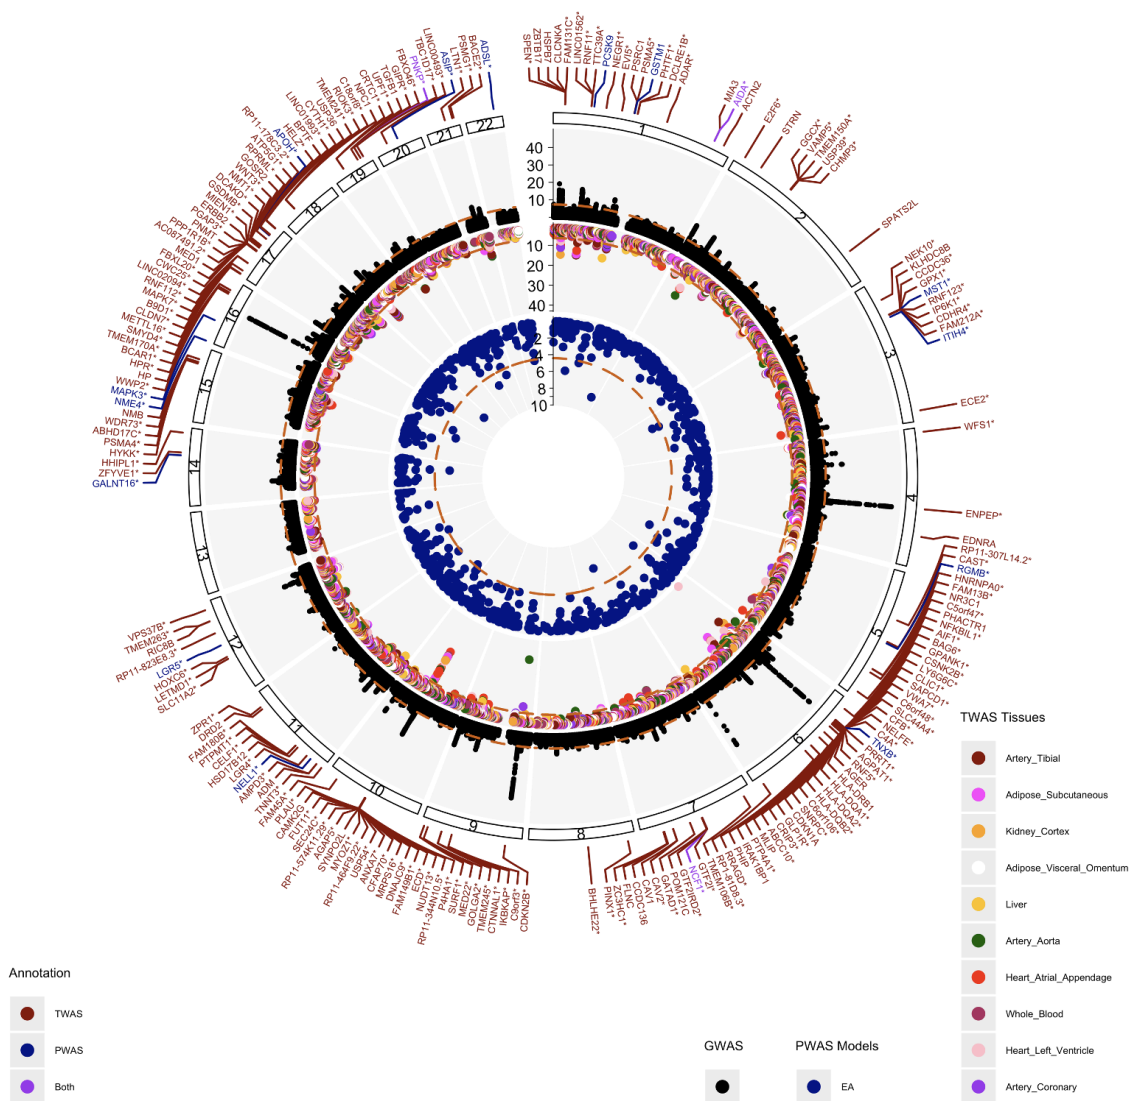

Supplemental Figure 1: Circos plots for A) MRI LV Mass, B) MRI LV End-Systolic Volume, C) MRI LV End-Diastolic Volume, and D) HF - European representing identified associations through GWAS (black), TWAS (red), and PWAS (blue).

## Supplemental Figure 2: Gene-Set Enrichment Results - Additional Phenotypes

**A**

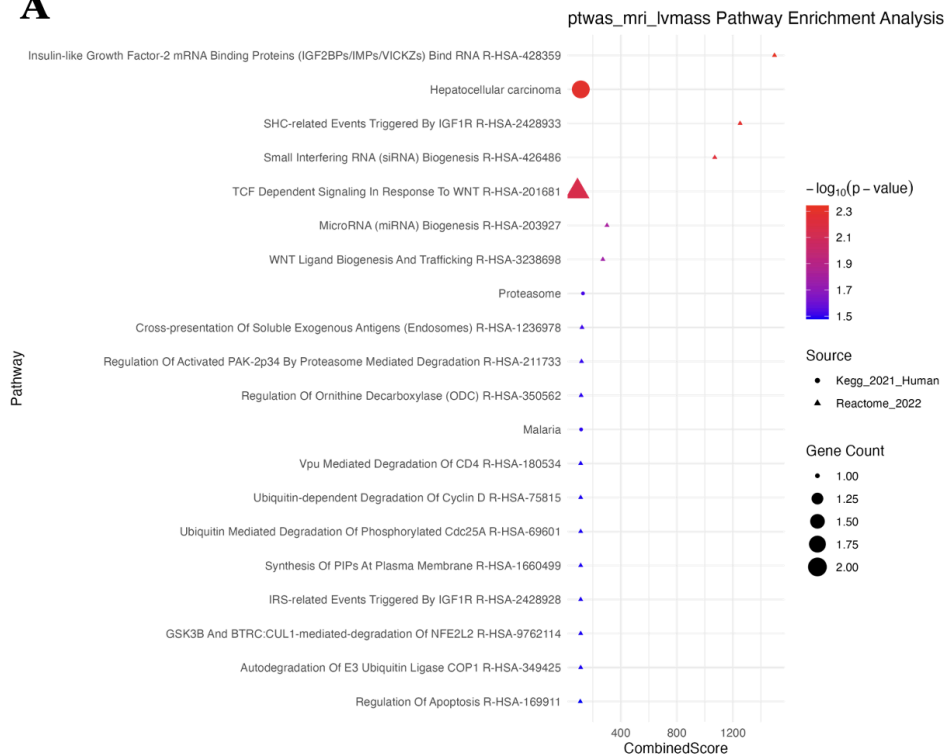

**B**

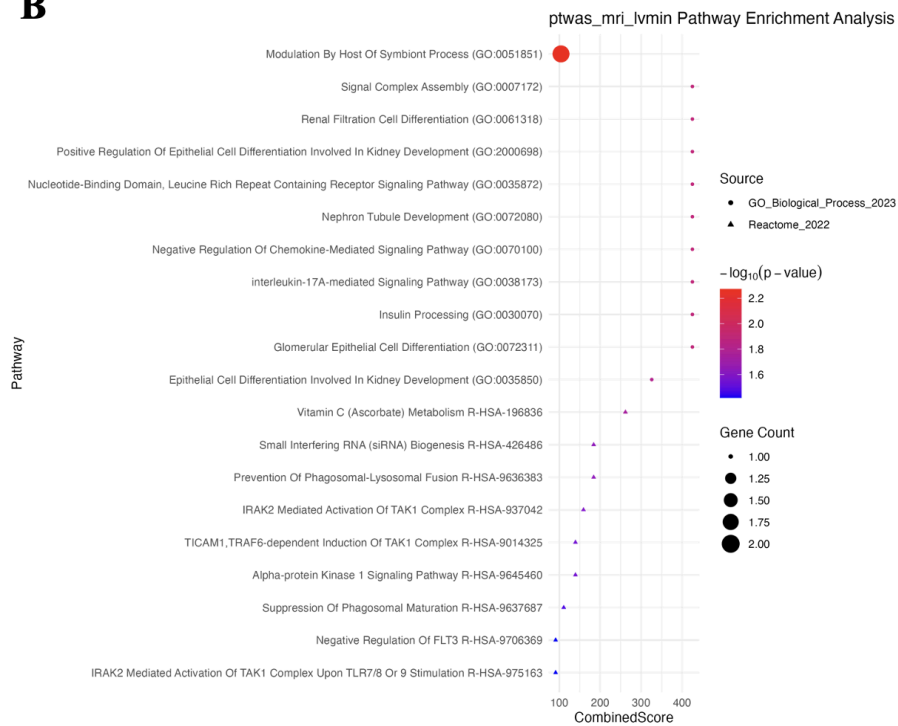

**C**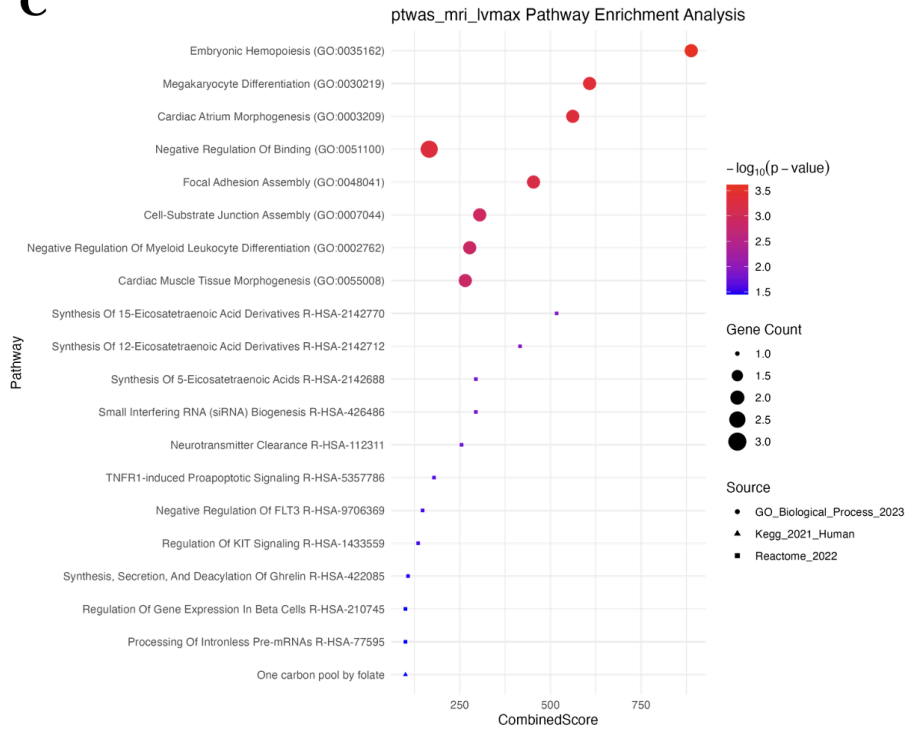**D**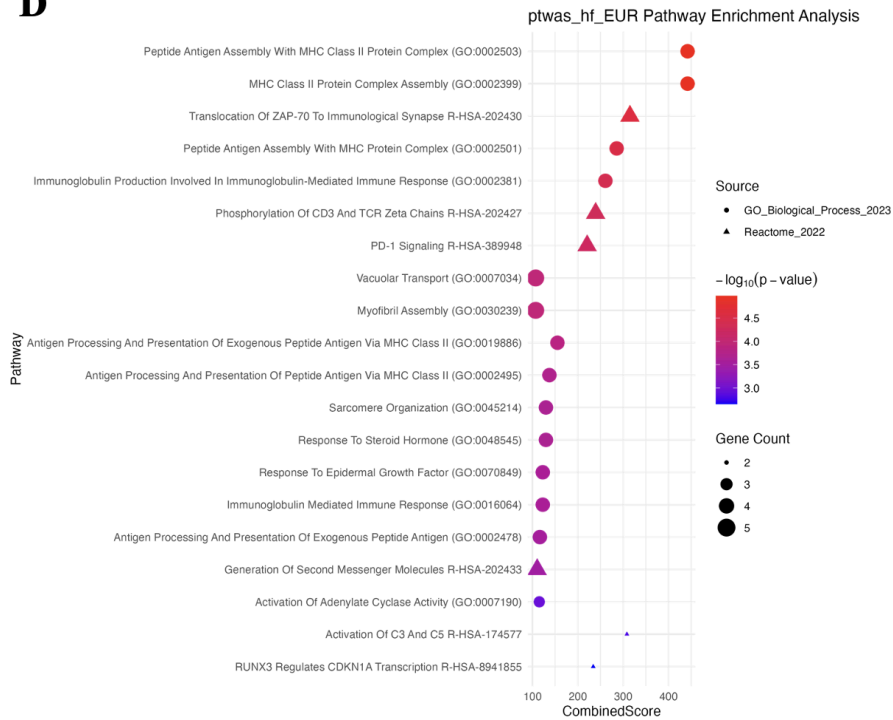

**Supplemental Figure 2: Gene-set enrichment results of TWAS and PWAS significant hits for A) MRI LV Mass, B) MRI LV End-Systolic Volume, C) MRI LV End-Diastolic Volume, and D) HF - European phenotypes.**

### Supplemental Figure 3: PPI Networks - Additional Phenotypes

#### MRI – LV Mass PPI Network

**A**

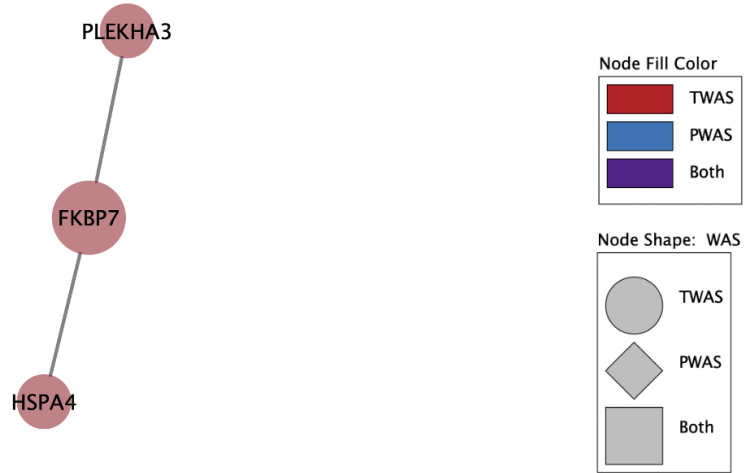

#### MRI – LVESV PPI Network

**B**

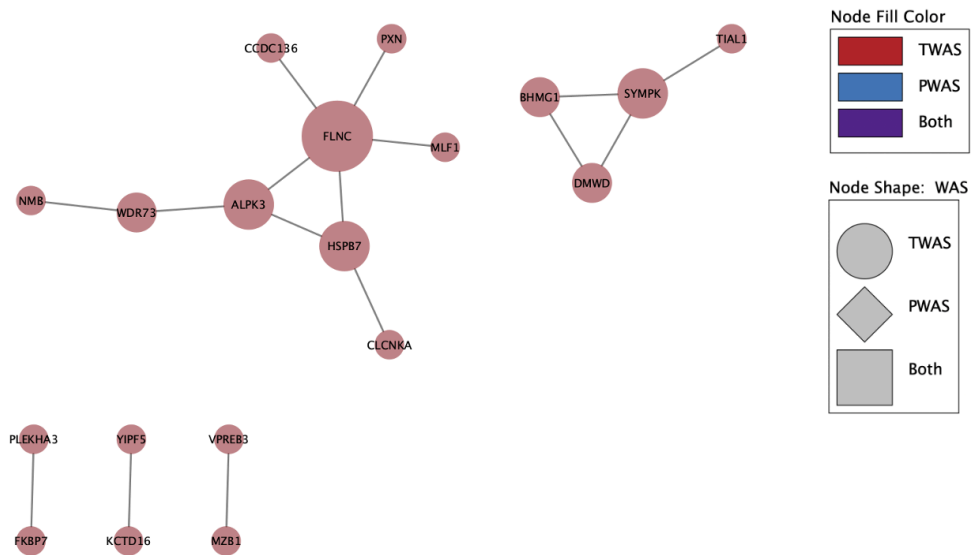

### MRI – LVEDV PPI Network

C

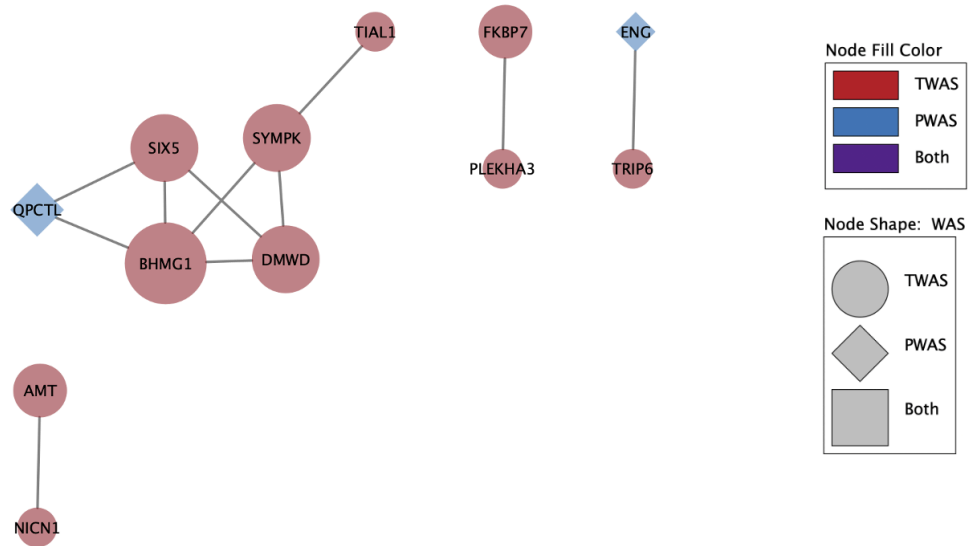

### HF – EUR PPI Network

D

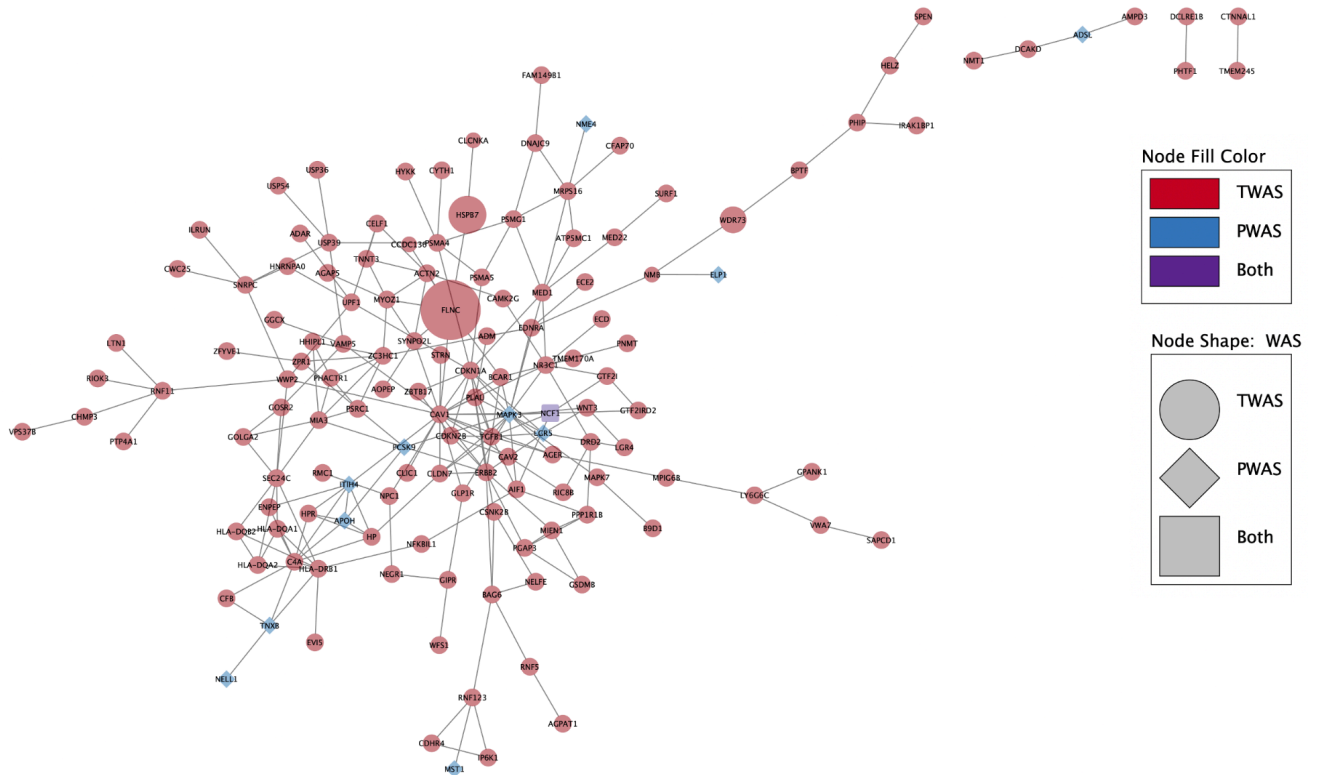

Supplemental Figure 3: PPI networks constructed using TWAS and PWAS significant hits for A) MRI LV Mass, B) MRI LV End-Systolic Volume, C) MRI LV End-Diastolic Volume, and D) HF - European phenotypes
